# Supplementary material for: Super-stable non-woven fabric-based membrane as a high-efficiency oil/water separator in full pH range
Source: Royal Society of Chemistry journal article supplement (doi:10.1039/c7ra01603d), 2017-01-01
Supplement: c7ra01603d1.pdf [file c7ra01603d1.pdf]

## Supporting information

### **Super-stable non-woven fabric-based membrane as high-efficiency oil/water separator in full pH range**

Zhongwei Diao,<sup>a</sup> Lei Wang,<sup>a,\*</sup> Peng Yu,<sup>a</sup> He Feng,<sup>a</sup> Li Zhao,<sup>a</sup> Wei Zhou<sup>a</sup> and  
Honggang Fu<sup>a,b,\*</sup>

<sup>a</sup>Key Laboratory of Functional Inorganic Material Chemistry, Ministry of Education  
of the People's Republic of China

Heilongjiang University

Harbin 150080

<sup>b</sup>National Center for International Research on Catalytic technology, China

Harbin 150080

E-mail: fuhg@vip.sina.com; wanglei0525@126.com

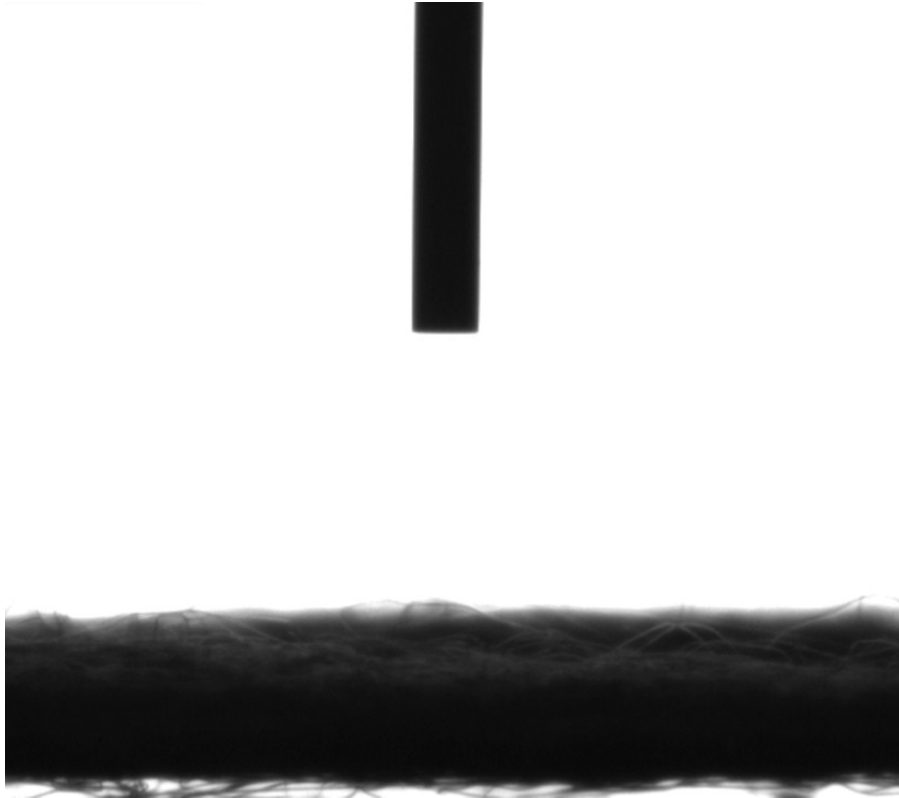

**Fig. S1** Photograph of a chloroform droplet on PS/non-woven fabric hybrid membrane with a contact angle of  $0^\circ$ , indicating the well superoleophilicity of the synthetic hybrid membrane.

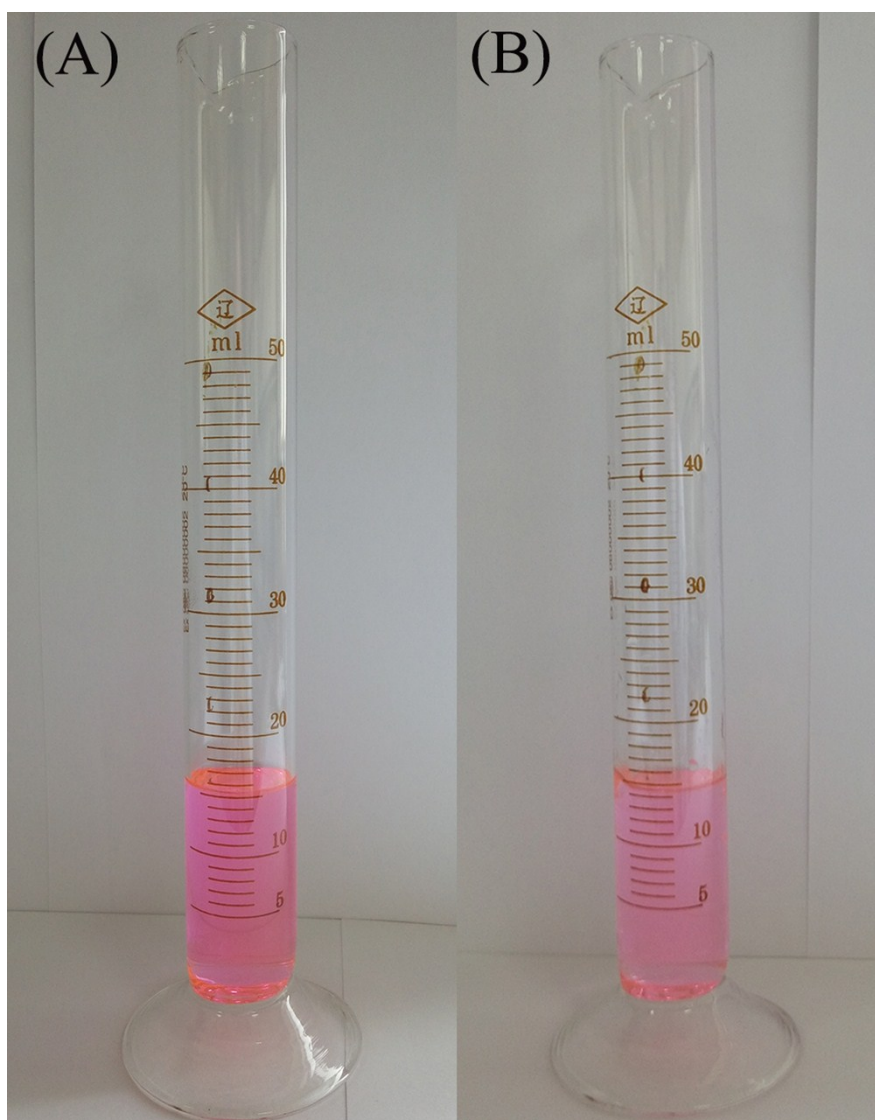

**Fig. S2** The volume measure images of the chloroform (colored with Rhodamine B) before (A) and after (B) separation from the oil/water mixture.

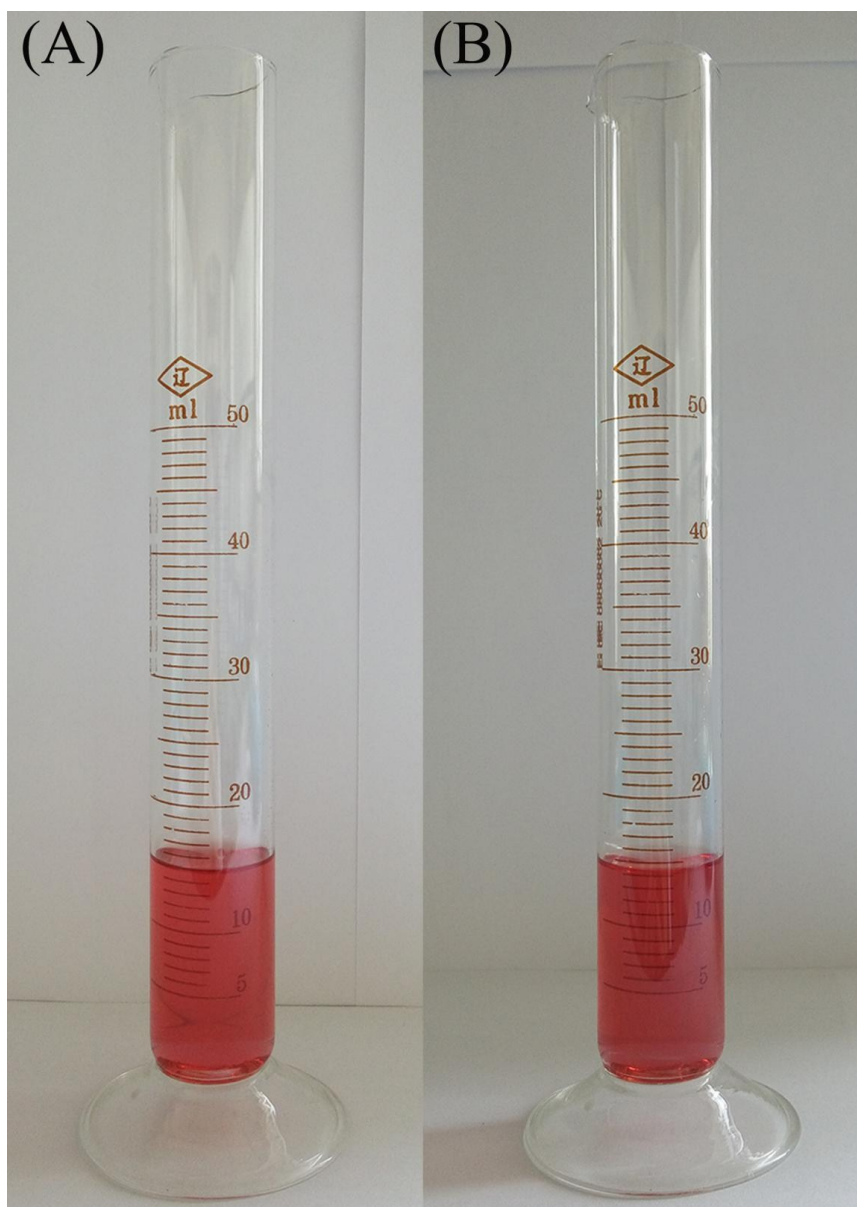

**Fig. S3** The volume measure images of the n-heptane (colored with Sudan Red) before (A) and after (B) separation from the oil/water mixture.
